# Supplementary material for: Low content Ru-incorporated Pd nanowires for bifunctional electrocatalysis
Source: Royal Society of Chemistry journal article supplement (doi:10.1039/d1ra05577a), 2021-01-01
Supplement: d1ra05577a1.pdf [file d1ra05577a1.pdf]

Electronic Supplementary Information (ESI)

# **Low content Ru-incorporated Pd nanowires for bifunctional electrocatalysis**

*Yongdeog Kweon, Sunguk Noh, and Jun Ho Shim\**

Department of Chemistry and Institute of Basic Science, Daegu University, Gyeongsan 38453,  
Republic of Korea

\*E-mail: [junhoshim@daegu.ac.kr](mailto:junhoshim@daegu.ac.kr)

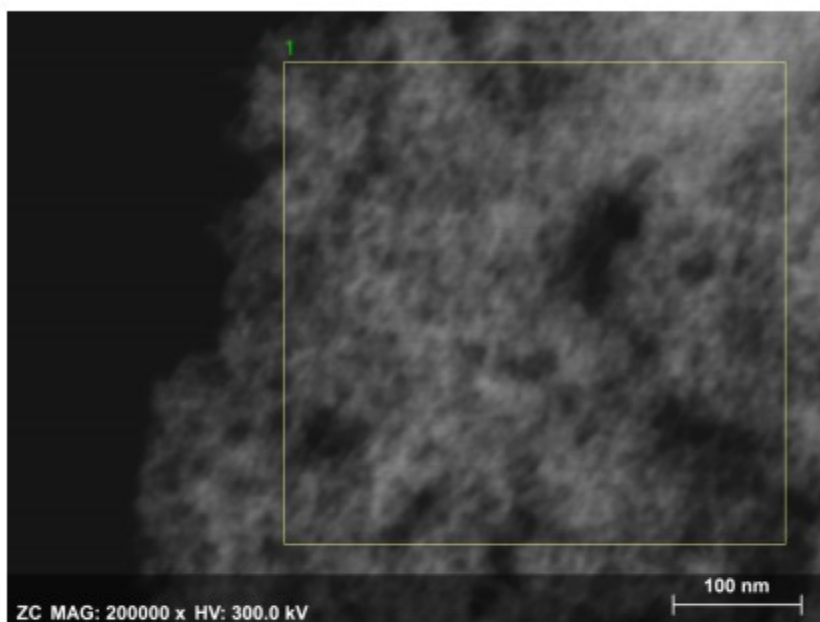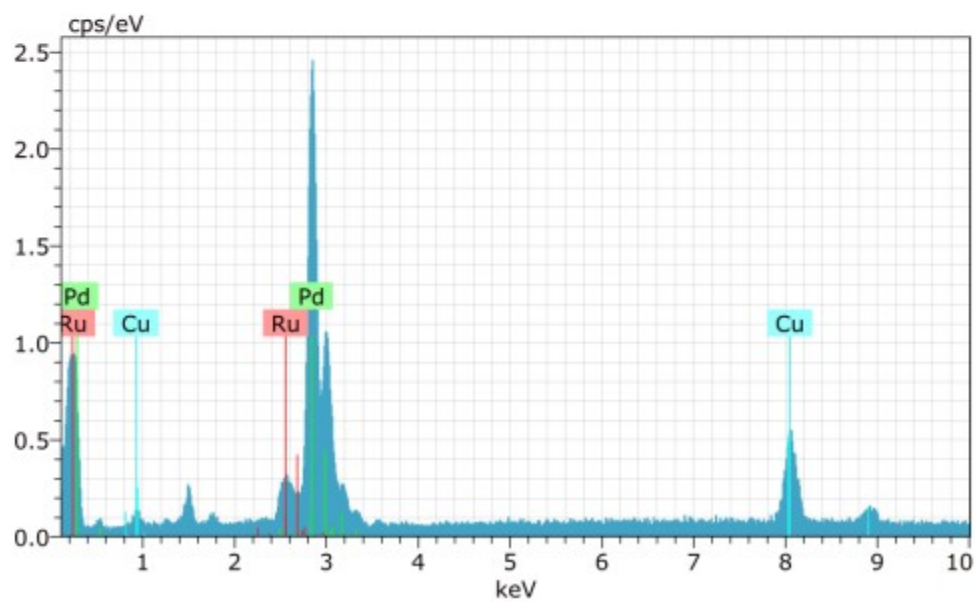

**Figure S1.** TEM/EDS analysis of the nRuPd/C sample.

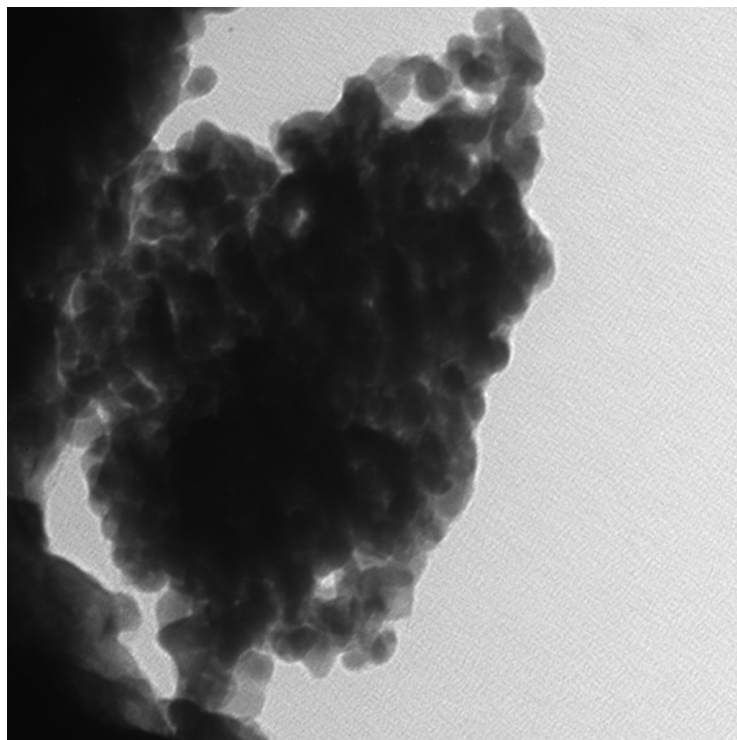

PTPd.100K-6.tif  
Print Mag: 954000x @ 7.0 in

20 nm  
HV=100.0kV  
Direct Mag: 100000x  
AMT Camera System

**Figure S2.** TEM images of the nPtPd nanowires.

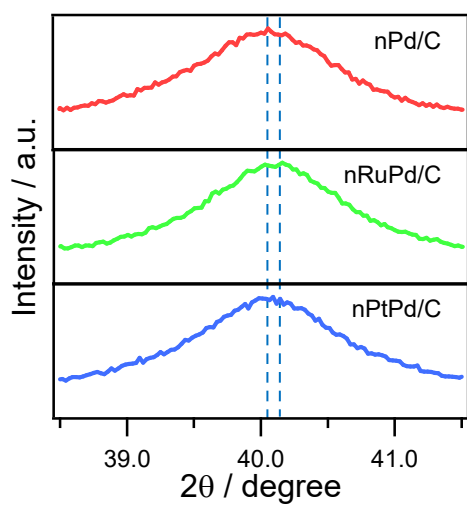

**Figure S3.** XRD patterns of the (111) reflection in nPd/C, nRuPd/C, and nPtPd/C.

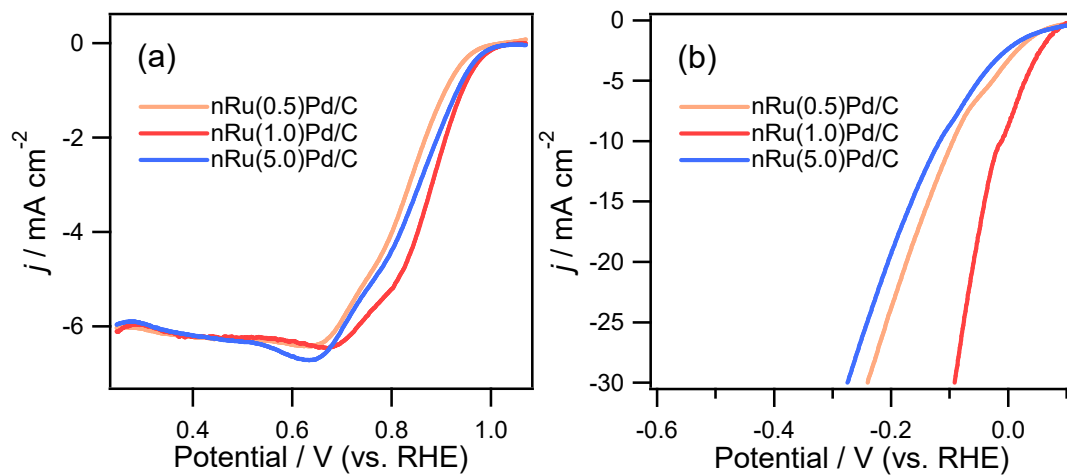

**Figure S4.** RDE polarization curves of a series of nRuPd/C for (a) ORR and (b) HER at various Ru concentrations (0.5, 1.0, 5.0 mM).

**Table S1.** Comparison of the ORR/HER performance of Ru-based catalysts in alkaline medium.

| Catalysts                             | ORR (0.1 M KOH)  |                           | HER (1.0 M KOH)                                   |                                     | Refs      |
|---------------------------------------|------------------|---------------------------|---------------------------------------------------|-------------------------------------|-----------|
|                                       | $E_{1/2}$<br>[V] | $E_{\text{onset}}$<br>[V] | $\eta$<br>[mV, at<br>-10 mA<br>cm <sup>-2</sup> ] | Tafel slope [mV dec <sup>-1</sup> ] |           |
| CoRu-<br>O/A@HNC-2                    | 0.821            | 0.937                     | 85.0                                              | 72.5                                | S1        |
| RuNi/CQDs                             | -                | -                         | 13.0                                              | 40.0                                | S2        |
| Ru <sub>2</sub> Ni <sub>2</sub> SNs/C | -                | -                         | 40.0                                              | 23.0                                | S3        |
| Ru@NGT                                | 0.830            | 0.970                     | 60.0                                              | 81.0                                | S4        |
| Ru <sub>2</sub> P/RGO-20              |                  |                           | 13.0                                              | 56.0                                | S5        |
| Ru-NC-700                             | -                | -                         | 12.0                                              | 14.0                                | S6        |
| Ni@Ni <sub>2</sub> P-Ru               | -                | -                         | 31.0                                              | 41.0                                | S7        |
| nRuPd/C                               | 0.936            | 1.038                     | 11.7                                              | 50.1                                | This work |

## References

- S1. G. Li, K. Zheng, W. Li, Y. He and C. Xu, Ultralow Ru-induced bimetal electrocatalysts with a Ru-enriched and mixed-valence surface anchored on a hollow carbon matrix for oxygen reduction and water splitting, *ACS Appl. Mater. Interfaces*, 2020, **12**, 46, 51437–51447.
- S2. Y. Liu, X. Li, Q. Zhang, W. Li, Y. Xie, H. Liu, L. Shang, Z. Liu, Z. Chen, L. Gu, Z. Tang, T. Zhang and S. Lu, A general route to prepare low-ruthenium-content bimetallic electrocatalysts for pH-universal hydrogen evolution reaction by using carbon quantum dots, *Angew. Chem. Int. Ed.*, 2020, **59**, 1718–1726.
- S3. J. Ding, Q. Shao, Y. Feng, X. Huang, Ruthenium-nickel sandwiched nanoplates for efficient water splitting electrocatalysis, *Nano Energy*, 2018, **47**, 1-7.
- S4. B. K. Barman, B. Sarkar, P. Ghosh, M. Ghosh, G. M. Rao and K. K. Nanda, In situ decoration of ultrafine Ru nanocrystals on N-doped graphene tube and their applications as oxygen reduction and hydrogen evolution catalyst, *ACS Appl. Energy Mater.*, 2019, **2**, **10**, 7330-7339.
- S5. T., Liu, S. Wnag, Q. Zhang, L. Chen, W. Hu and C. M. Li, Ultrasmall Ru<sub>2</sub>P nanoparticles on graphene: a highly efficient hydrogen evolution reaction electrocatalyst in both acidic and alkaline media, *Chem. Commun.*, 2018, **54**, 3343-3346.
- S6. B. Lu, L. Guo, F. Wu, Y. Peng, J. E. Lu, T. J. Smart, N. Wang, Y. Z. Finfrock, D. Morris, P. Zhang, N. Li, P. Gao, Y. Ping and S. Chen, Ruthenium atomically dispersed in carbon outperforms platinum toward hydrogen evolution in alkaline media, *Nat. Commun.*, 2019, **10**, 631.
- S7. Y. Liu, S. Liu, Y. Wang, Q. Zhang, L. Gu, S. Zhao, D. Xu, Y. Li, J. Bao and Z. Dai, Ru modulation effects in the synthesis of unique rod-like Ni@Ni<sub>2</sub>P-Ru heterostructures and their remarkable electrocatalytic hydrogen evolution performance, *J. Am. Chem. Soc.*, 2018, **140**, 2731-2734.
